# Supplementary material
Source: MDPI journal article supplement (https://www.mdpi.com/1996-1073/14/15/4715)
Supplement: s1 [file s1]

Archive with 5 entries (5 files):
- energies-1286931-supplementary/Table S1.pdf
- energies-1286931-supplementary/Table S2.pdf
- energies-1286931-supplementary/Table S3.pdf
- energies-1286931-supplementary/Table S4.pdf
- energies-1286931-supplementary/Table S5.pdf
